# Supplementary material for: Self-assembled novel Co/Ni-based ε-Keggin crystal materials as highly efficient photocatalysts for diluted CO2 photoreduction
Source: Royal Society of Chemistry journal article supplement (doi:10.1039/d3ta06964h), 2024-01-01
Supplement: d3ta06964h1.pdf [file d3ta06964h1.pdf]

## Supporting Information

# Self-assembled Novel Co/Ni-based $\epsilon$ -Keggin Crystal Materials as Highly Efficient Photocatalysts for Diluted CO<sub>2</sub> Photoreduction

Yin-Hua Zhu<sup>a</sup>, Jian-Bo Yang<sup>a</sup>, Pin-Fang Yan<sup>a</sup>, Zhi-Ming Dong<sup>a</sup>, Hua Mei<sup>a,\*</sup>, Yan Xu<sup>a,b,\*</sup>

<sup>a</sup>State Key Laboratory of Materials-Oriented Chemical Engineering, College of Chemical Engineering, Nanjing Tech University, Nanjing, 211816, P.R. China.

<sup>b</sup>State Key Laboratory of Coordination Chemistry, Coordination Chemistry Institute, Nanjing University, Nanjing 210023, P.R. China.

Corresponding Authors

E-mail: yanxu@njtech.edu.cn (Y. Xu); meihua@njtech.edu.cn (H. Mei).

# Table of Contents

## 1. Materials and Physical property studies.

## 2. Experimental section

### 2.1 Electrochemical measurements

## 3. Structure

**Fig. S1** (a) The view of **Co- $\epsilon$ -Keggin** under an optical microscope. (b) The view of **Ni- $\epsilon$ -Keggin** under an optical microscope.

**Fig. S2** (a) Ball-and-stick model of Co ion coordination mode. (b) Polyhedron model of Co ion coordination mode.

**Fig. S3** (a) Ball-and-stick model diagram of **Co- $\epsilon$ -Keggin**. (b) polyhedron model diagram of **Co- $\epsilon$ -Keggin**.

**Fig. S4** (a)  $\epsilon$ -Keggin polyhedron diagram. (b) **Co- $\epsilon$ -Keggin** polyhedron diagram. (c) **Ni- $\epsilon$ -Keggin** polyhedron diagram.

## 4. Characterizations

### 4.1 EDS-Mapping

**Fig. S5** (a) EDS-mapping diagram of **Co- $\epsilon$ -Keggin**. (b) EDS-mapping of **Ni- $\epsilon$ -Keggin**.

### 4.2 IR

**Fig. S6** The IR spectrum of **Co- $\epsilon$ -Keggin**.

**Fig. S7** The IR spectrum of **Ni- $\epsilon$ -Keggin**.

### 4.3 PXRD patterns

**Fig. S8** The experimental and simulated powder PXRD patterns of **Co- $\epsilon$ -Keggin**.

**Fig. S9** The experimental and simulated powder PXRD patterns of **Ni- $\epsilon$ -Keggin**.

**Fig. S10** Solvent stability in TEOA/CH<sub>3</sub>CN mixed solvents of **Ni- $\epsilon$ -Keggin**.

### 4.4 TGA

**Fig. S11** The TG curve for **Co- $\epsilon$ -Keggin**.

**Fig. S12** The TG curve for **Ni- $\epsilon$ -Keggin**.

### 4.5 XPS

**Fig. S13** (a) Co 2p spectrum analysis of **Co- $\epsilon$ -Keggin**. (b) Mo 3d spectrum analysis of **Co- $\epsilon$ -Keggin**. (c) Full spectrum analysis of **Co- $\epsilon$ -Keggin**. (d) Ni 2p spectrum analysis of **Ni- $\epsilon$ -Keggin**. (e) Mo 3d spectrum analysis of **Ni- $\epsilon$ -Keggin**. (f) Full spectrum analysis of **Ni- $\epsilon$ -Keggin**.

## 5. Photocatalytic CO<sub>2</sub> reduction experiments

**Fig. S14** The photograph of the CO<sub>2</sub> photoreduction devices.

**Fig. S15** UV/vis spectra, K-M function curves of **Co- $\epsilon$ -Keggin**.

**Fig. S16** Mott-Schottky plots for catalysts **Co- $\epsilon$ -Keggin**.

**Fig. S17** Mott-Schottky plots for catalysts **Ni- $\epsilon$ -Keggin**.

**Fig. S18** GC profiles of CO<sub>2</sub> reduction to CO without light.

**Fig. S19** GC profiles of 10% CO<sub>2</sub> reduction to CO with **Ni- $\epsilon$ -Keggin** as catalyst after reaction 6 h.

**Fig. S20** GC profiles of 10% CO<sub>2</sub> reduction to CO with **Co- $\epsilon$ -Keggin** as catalyst after reaction 6 h.

**Fig. S21** PXRD patterns of **Co- $\epsilon$ -Keggin** before and after CO<sub>2</sub>RR.

**Fig. S22** PXRD patterns of **Ni- $\epsilon$ -Keggin** before and after CO<sub>2</sub>RR.

**Fig. S23** Z- scheme diagram of the electron transfer process by using **Ni- $\epsilon$ -Keggin** as photocatalyst.

**Fig. S24** Comparison of the activity of the photocatalytic CO<sub>2</sub>RR under different conditions when catalyst **Ni- $\epsilon$ -Keggin** was used.

**Fig. S25** K-M function curves of [Ru(bpy)<sub>3</sub>]Cl<sub>2</sub>. Mott-Schottky plots for [Ru(bpy)<sub>3</sub>]Cl<sub>2</sub>.

**Fig. S26** CO<sub>2</sub> adsorption isotherms (298 K) of {Ni<sub>4</sub>Mo<sub>12</sub>} and **Ni- $\epsilon$ -Keggin** materials.

## 6. Table

**Table S1.** Comparison of reported POM-based hybrid materials photocatalyst for pure CO<sub>2</sub> to CO conversion.

**Table S2.** Comparison of reported POM-based hybrid materials photocatalyst for 10% diluted CO<sub>2</sub> to CO conversion.

**Table S3.** Selected bond lengths (Å) for **Co- $\epsilon$ -Keggin**.

**Table S4.** Selected bond lengths (Å) for **Ni- $\epsilon$ -Keggin**.

**Table S5.** Bond valence calculation (BVC) for **Co- $\epsilon$ -Keggin**.

**Table S6.** Bond valence calculation (BVC) for **Ni- $\epsilon$ -Keggin**.

**Table S7.** Partial crystallographic data and structural refinement of **Co- $\epsilon$ -Keggin** and **Ni- $\epsilon$ -Keggin**.

## **7. Theoretical calculations**

**Fig. S27** (a) DFT-derived CO<sub>2</sub> binding structures of catalyst **Co- $\epsilon$ -Keggin**. (b) DFT-derived CO<sub>2</sub> binding structures of catalyst **Ni- $\epsilon$ -Keggin**. (c) DFT-derived H<sub>2</sub>O binding structures of catalyst **Co- $\epsilon$ -Keggin**. (d) DFT-derived H<sub>2</sub>O binding structures of catalyst **Ni- $\epsilon$ -Keggin**.

**Fig. S28** The adsorption energies of CO<sub>2</sub> for **Ni- $\epsilon$ -Keggin** and **Ni<sub>4</sub>Mo<sub>12</sub>** were compared.

## **8. References**

# 1. Materials and Physical property studies.

All chemicals were purchased from Aladdin Shanghai without further purification. The  $[\text{Mo}^{\text{V}}_{12}\text{O}_{30}(\mu_2\text{-OH})_{10}\text{H}_2\{\text{Ni}^{\text{II}}(\text{H}_2\text{O})_3\}_4]$  abbreviated to  $\{\text{Ni}_4\text{Mo}_{12}\}$  was synthesized according to the corresponding literature.<sup>[17]</sup> The contents of C, H, and N were acquired using a PerkinElmer 2400 element analyzer. FT-IR spectra were conducted on a Nicolet Impact 410 Fourier transform infrared spectrometer from 4000-400  $\text{cm}^{-1}$ . Powder X-ray diffraction (PXRD) patterns were performed on a Bruker D8X diffractometer with  $\text{Cu-K}\alpha$  ( $\lambda=1.5418 \text{ \AA}$ ) radiation at  $2\theta$  in the range of 5-50° with a step size of 0.02°. TGA measurements were performed by a Diamond thermogravimetric analyzer under an atmosphere of flowing nitrogen with a heating rate of 10°C  $\text{min}^{-1}$  from room temperature to 800°C. UV-vis diffuse reflectance spectra (Barium sulfate as reference) were collected on a SHIMADZU UV-2600 spectrophotometer in the range of 200-800 nm. The SEM were identified by using a Hitachi TM 3000 scanning electron microscope at an accelerating voltage of 20 kV. Elemental analyses (C, N and H) were determined by a Perkin-Elmer 2400 elemental analyzer. CO labelled by  $^{13}\text{C}$  was performed with gas chromatography-mass spectrometer (Agilent 6890 N/5975, USA).

## 2. Experimental section

### 2.1 Electrochemical measurements

The Mott-Schottky spots were carried out in an ambient environment by using the electrochemical workstation (CHI 760e) in a standard three-electrode system: The carbon cloth (CC, 1 cm×1 cm) modified with catalyst samples, carbon rod and Ag/AgCl were used as the working electrode, counter electrode, and the reference electrode, respectively. The catalyst of 2 mg was ground to powder and then dispersed in 1 mL of 0.5% Nafion solvent by ultrasonication to form a homogeneous ink. Subsequently, 200  $\mu\text{L}$  of the ink was deposited onto the carbon cloth and dried at room temperature for Mott-Schottky spots measurements. The Mott-Schottky plots were measured over an alternating current (AC)

frequency of 1000 Hz, 1500 Hz, and 2000 Hz, and three electrodes were immersed in the 0.2 M Na<sub>2</sub>SO<sub>4</sub> aqueous solution.

### 3. Structure

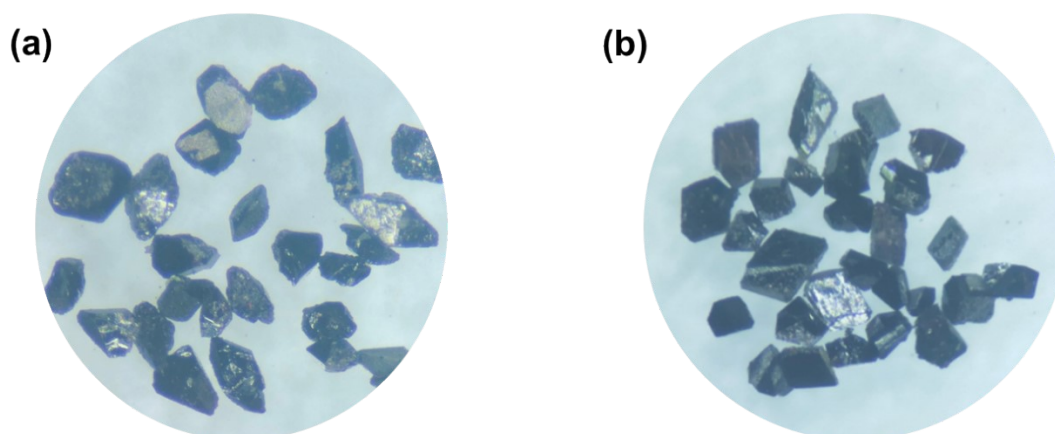

**Fig. S1** (a) The view of **Co-ε-Keggin** under an optical microscope. (b) The view of **Ni-ε-Keggin** under an optical microscope.

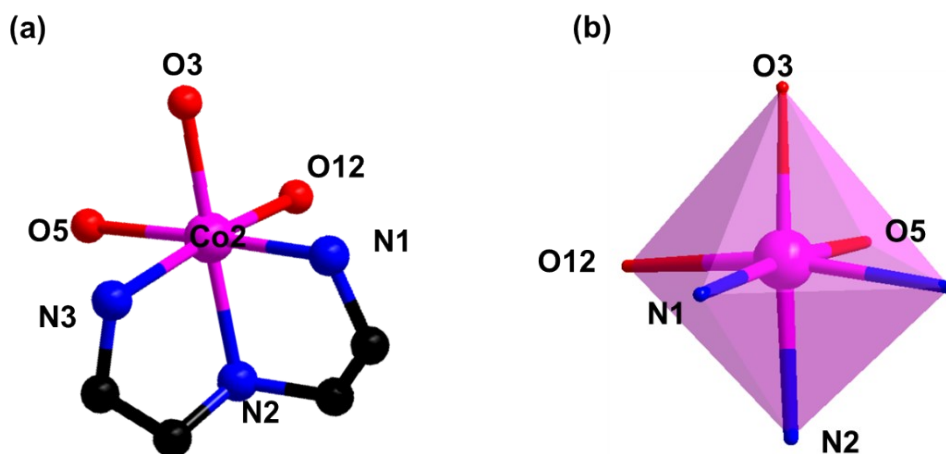

**Fig. S2** (a) Ball-and-stick model of Co ion coordination mode. (b) Polyhedron model of Co ion coordination mode.

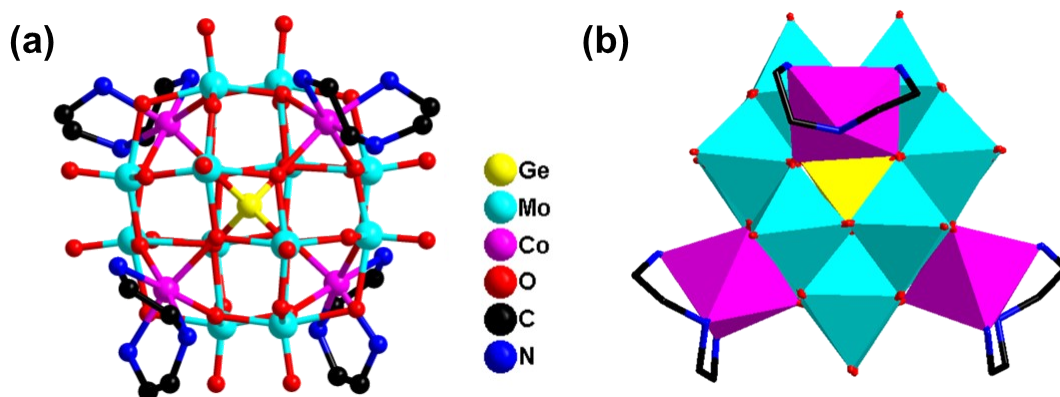

**Fig. S3** (a) Ball-and-stick model diagram of **Co- $\epsilon$ -Keggin**. (b) polyhedron model diagram of **Co- $\epsilon$ -Keggin**.

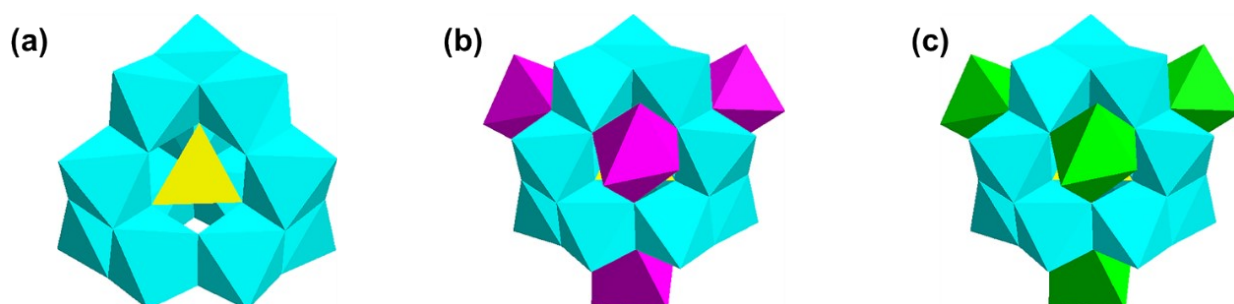

**Fig. S4** (a)  $\epsilon$ -Keggin polyhedron diagram. (b) **Co- $\epsilon$ -Keggin** polyhedron diagram. (c) **Ni- $\epsilon$ -Keggin** polyhedron diagram.

## 4. Characterizations

### 4.1 EDS-Mapping

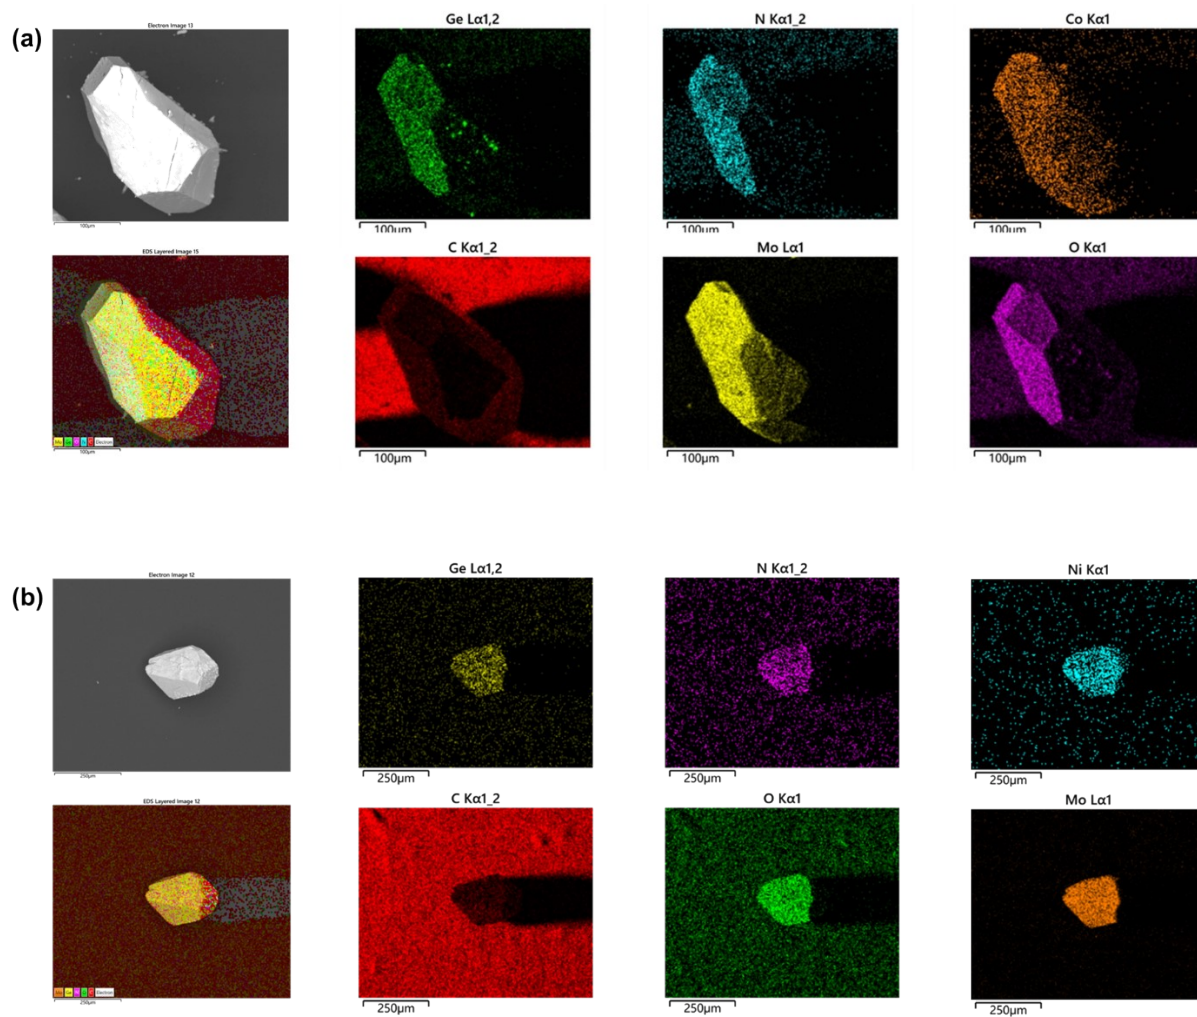

**Fig. S5** (a) EDS-mapping diagram of Co- $\epsilon$ -Keggin. (b) EDS-mapping of Ni- $\epsilon$ -Keggin.



## 4.2 IR

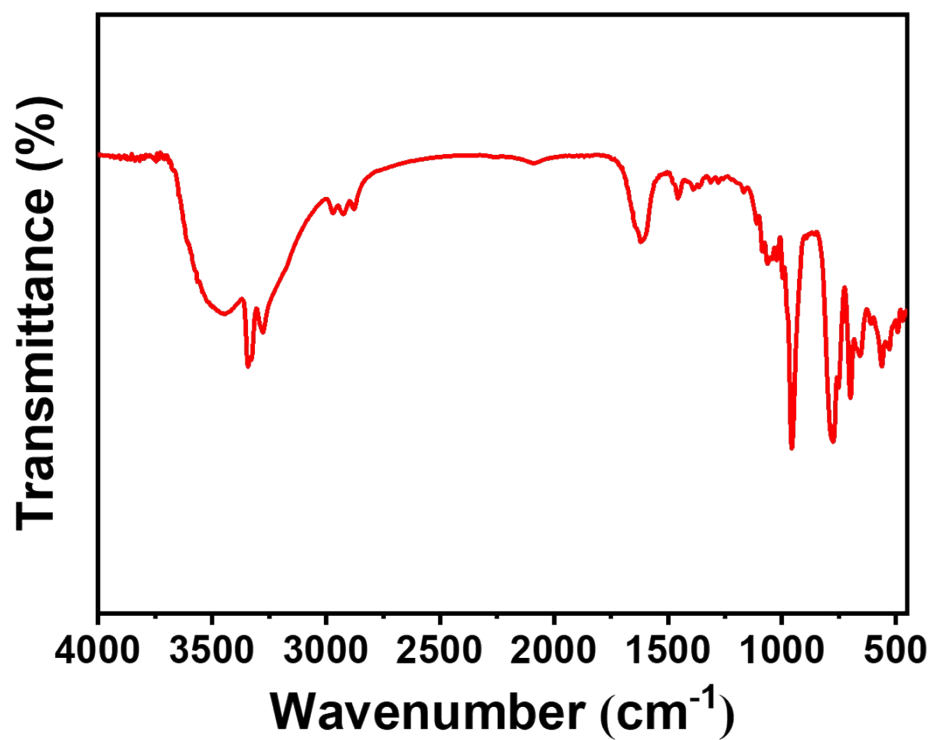

Fig. S6 The IR spectrum of Co-ε-Keggin.

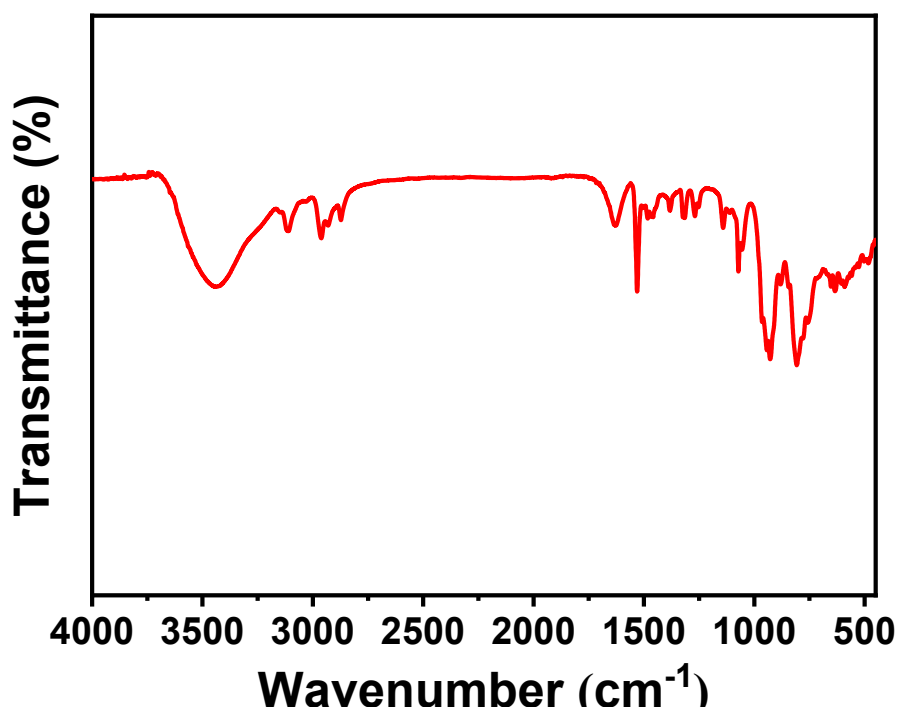

Fig. S7 The IR spectrum of Ni-ε-Keggin.

### 4.3 PXRD patterns

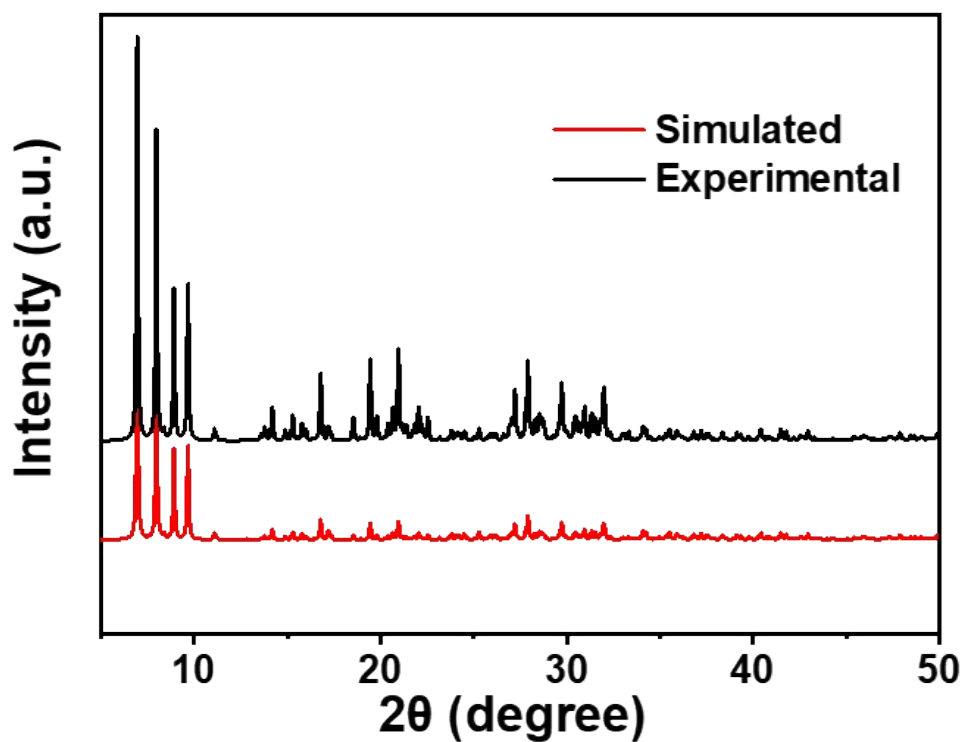

**Fig. S8** The experimental and simulated powder PXRD patterns of **Co-ε-Keggin**.

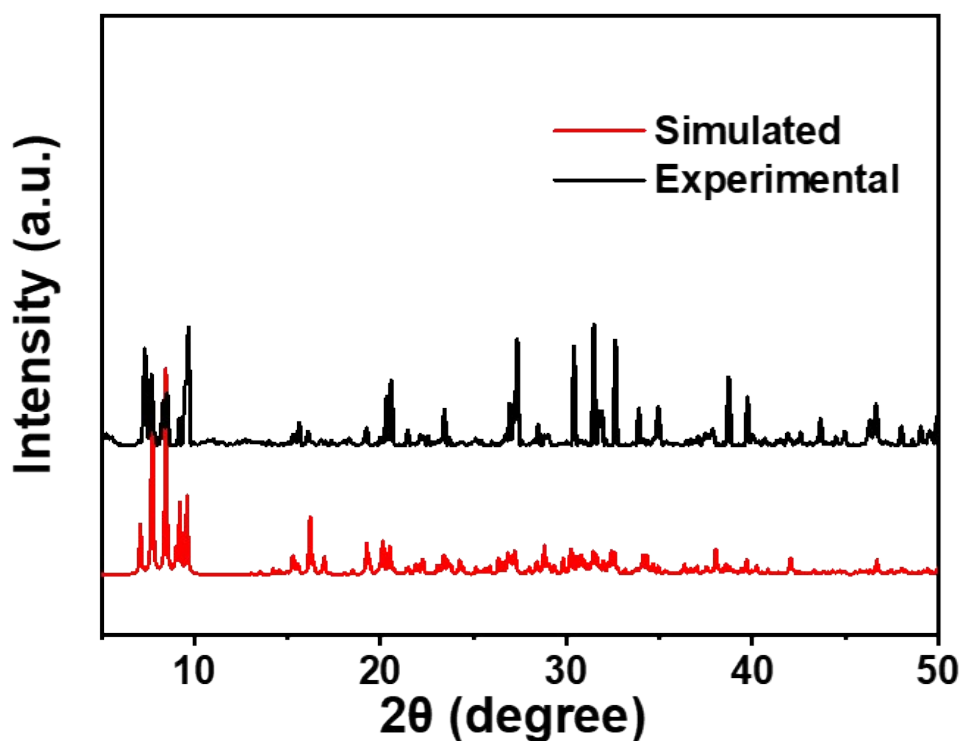

**Fig. S9** The experimental and simulated powder PXRD patterns of **Ni-ε-Keggin**.

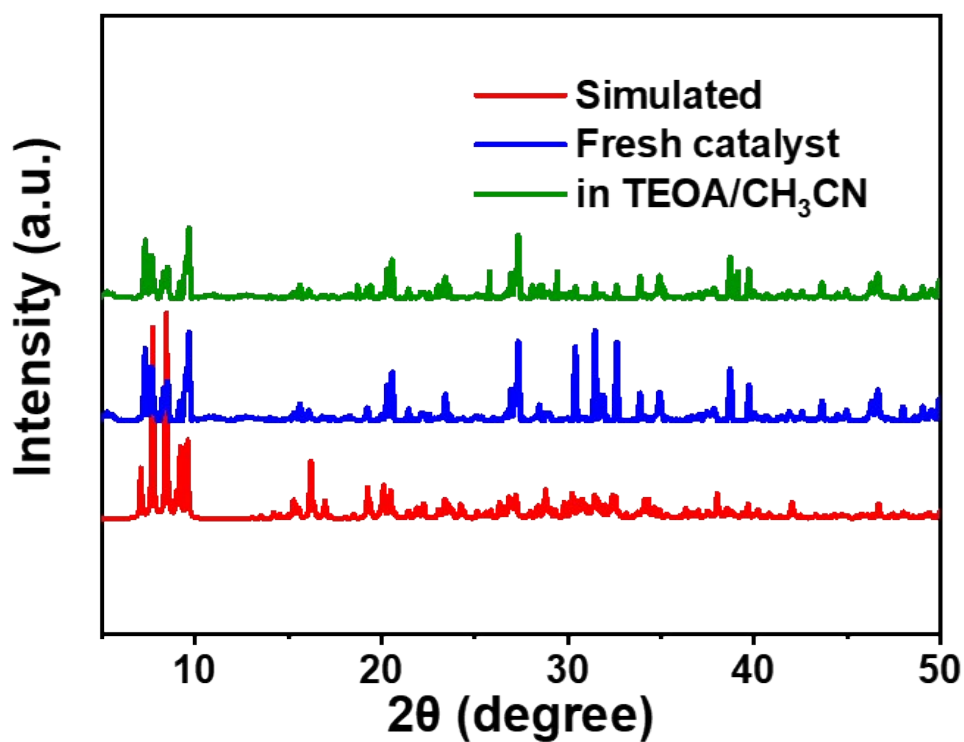

**Fig. S10** Solvent stability in TEOA/CH<sub>3</sub>CN mixed solvents of Ni- $\epsilon$ -Keggin.

#### 4.4 TGA

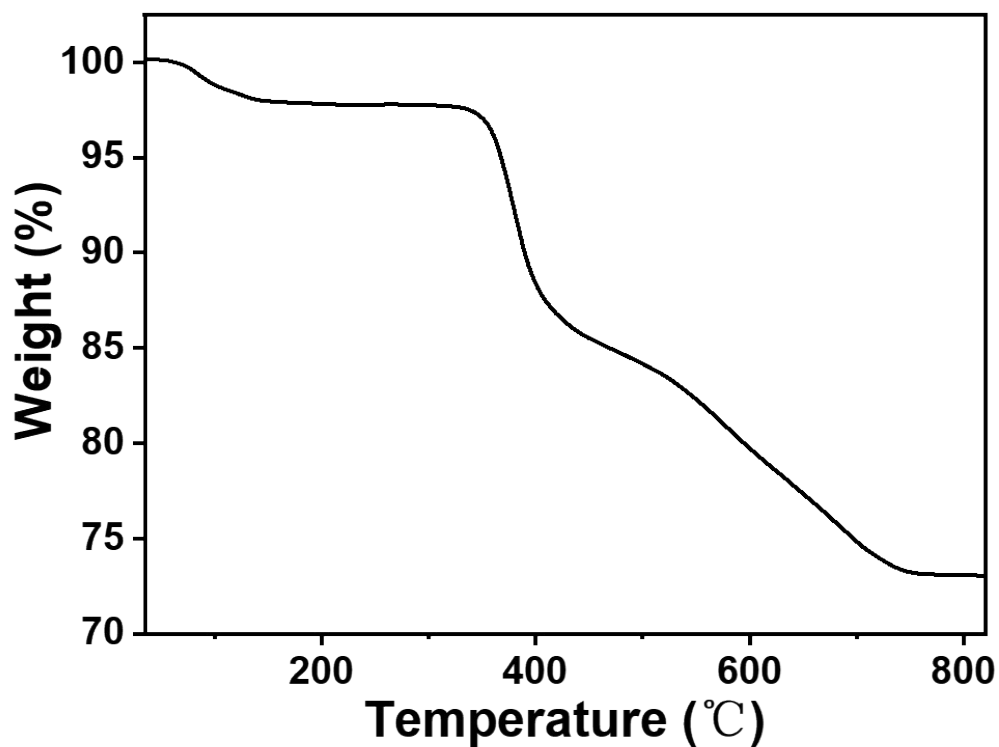

**Fig. S11** The TG curve for Co- $\epsilon$ -Keggin.

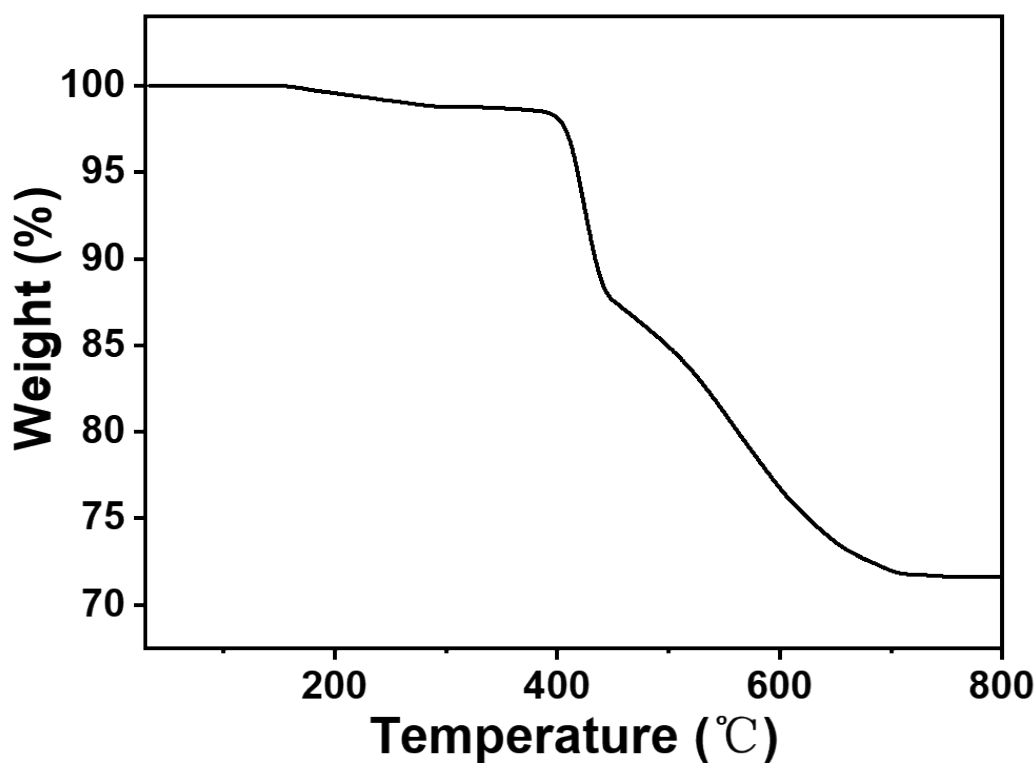

Fig. S12 The TG curve for Ni- $\epsilon$ -Keggin.

#### 4.5 XPS

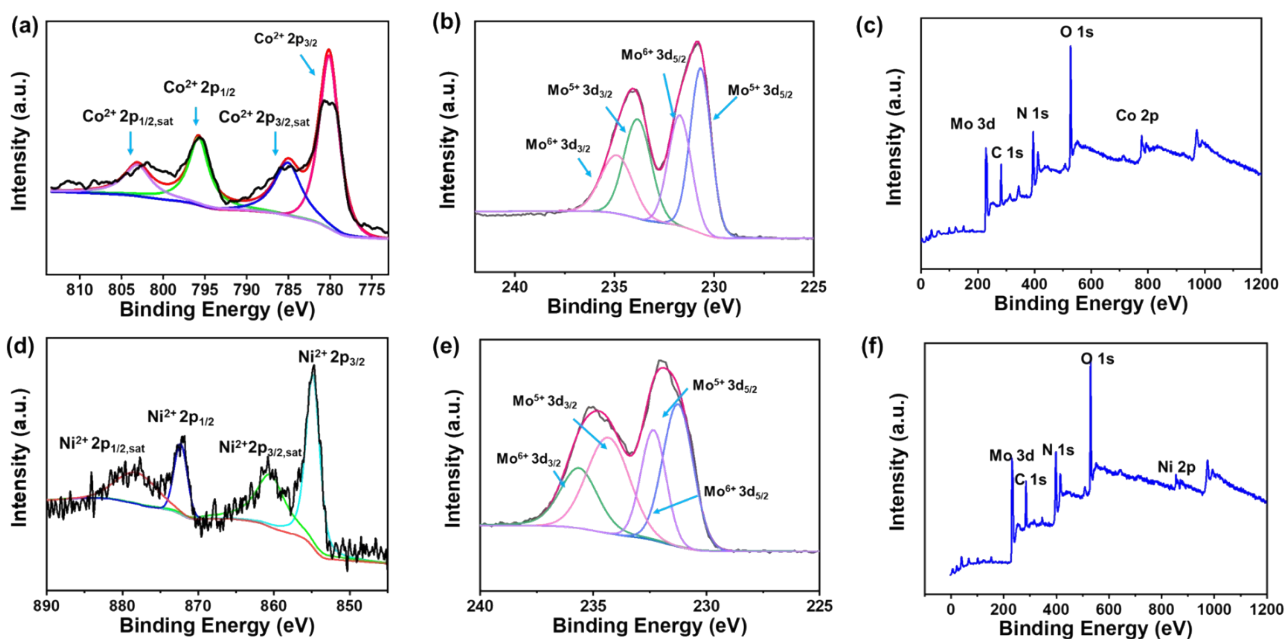

Fig. S13 (a) Co 2p spectrum analysis of Co- $\epsilon$ -Keggin. (b) Mo 3d spectrum analysis of Co- $\epsilon$ -Keggin. (c) Full spectrum analysis of Co- $\epsilon$ -Keggin. (d) Ni 2p spectrum analysis of Ni- $\epsilon$ -Keggin. (e) Mo 3d spectrum analysis of Ni- $\epsilon$ -Keggin. (f) Full spectrum analysis of Ni- $\epsilon$ -Keggin.

## 5. Photocatalytic CO<sub>2</sub> reduction experiments

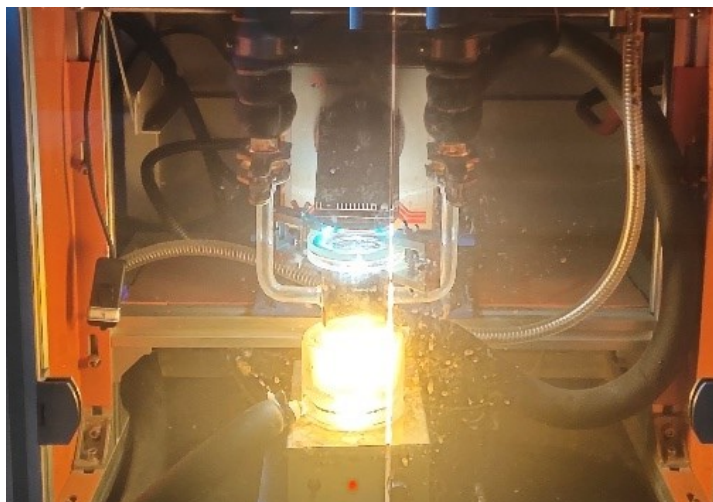

Fig. S14 The photograph of the CO<sub>2</sub> photoreduction devices.

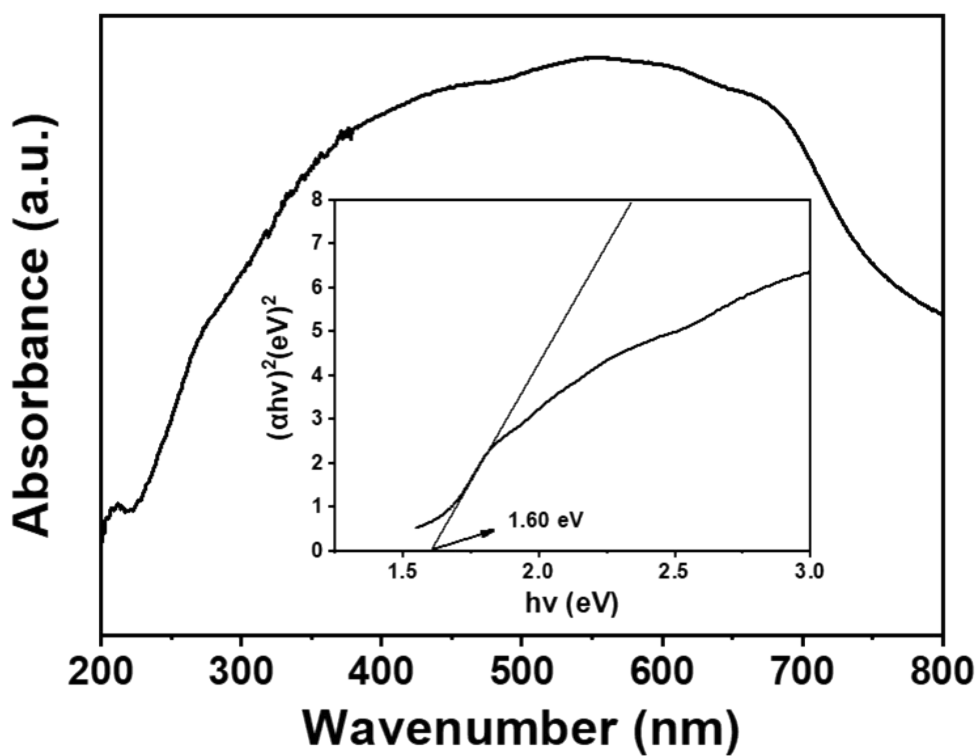

Fig. S15 UV/vis spectra, K-M function curves of Co- $\epsilon$ -Keggin.

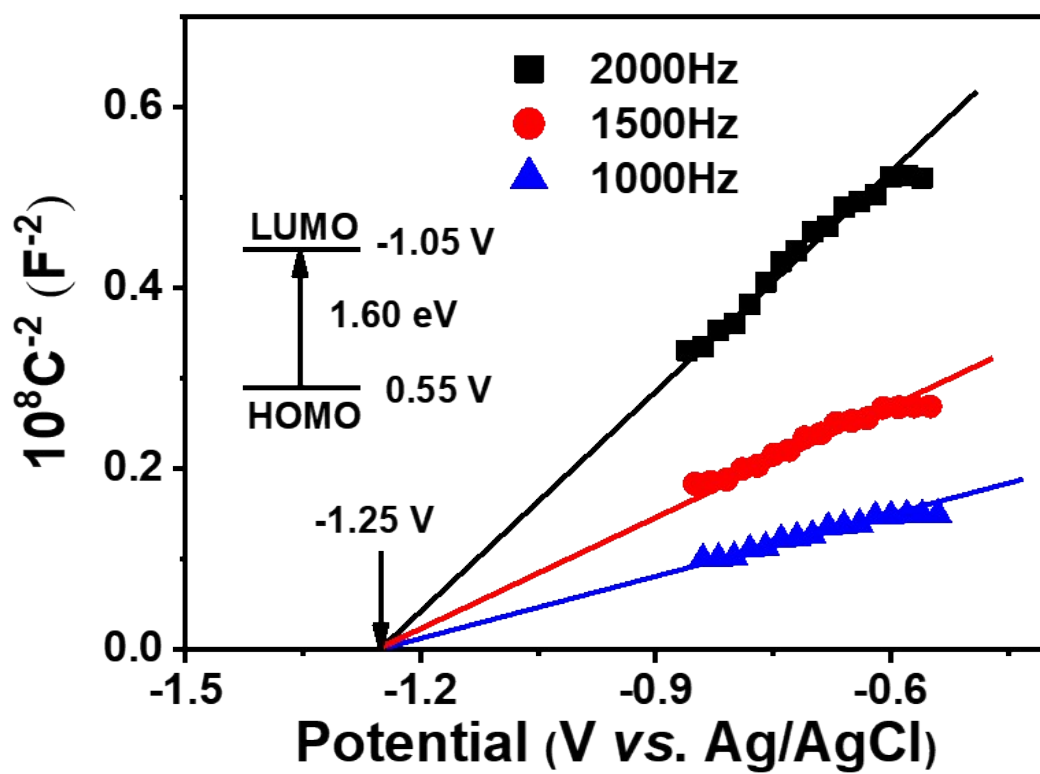

Fig. S16 Mott-Schottky plots for catalysts Co-ε-Keggin.

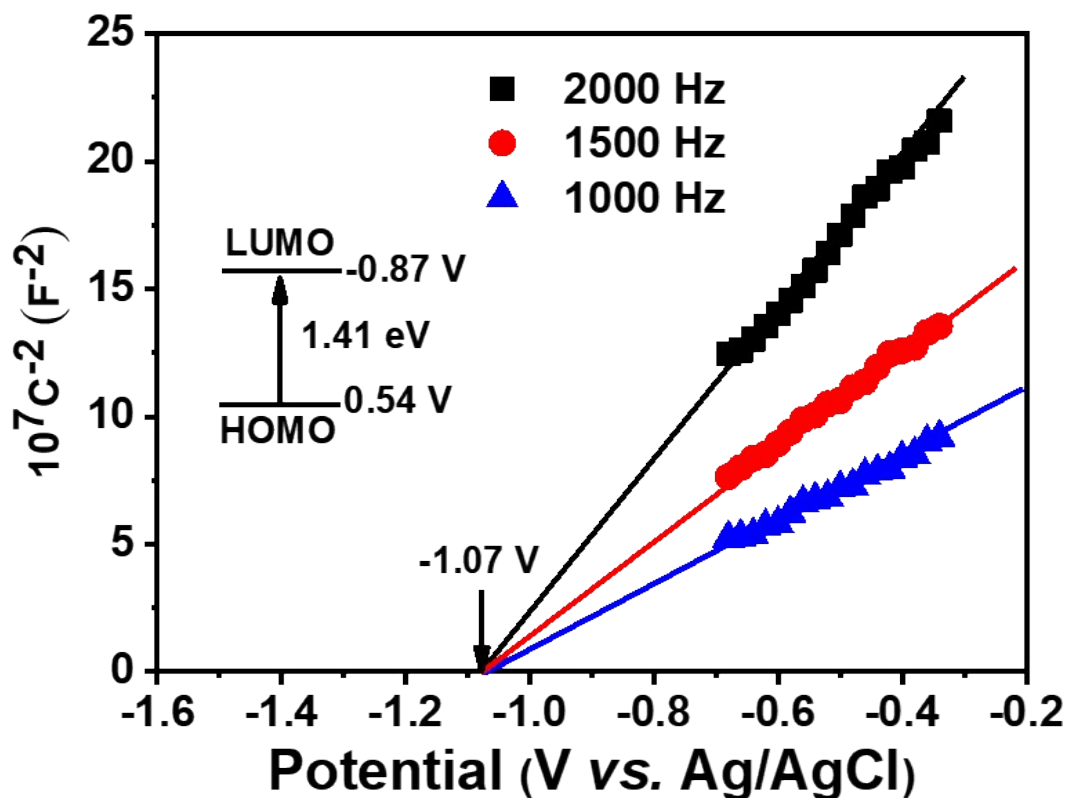

Fig. S17 Mott-Schottky plots for catalysts Ni- $\epsilon$ -Keggin.

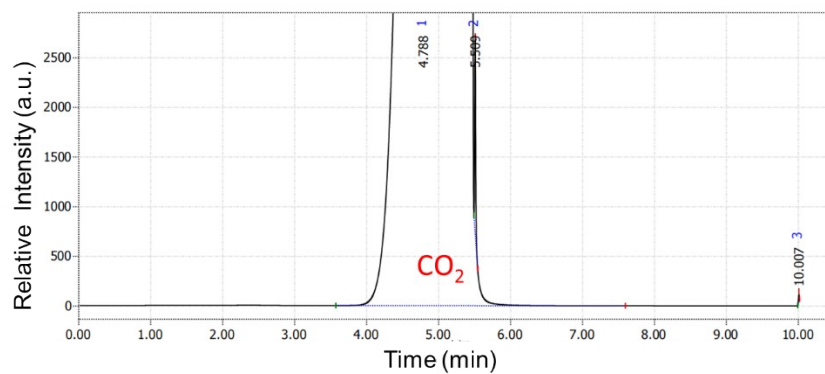

Fig. S18 GC profiles of CO<sub>2</sub> reduction to CO without light.

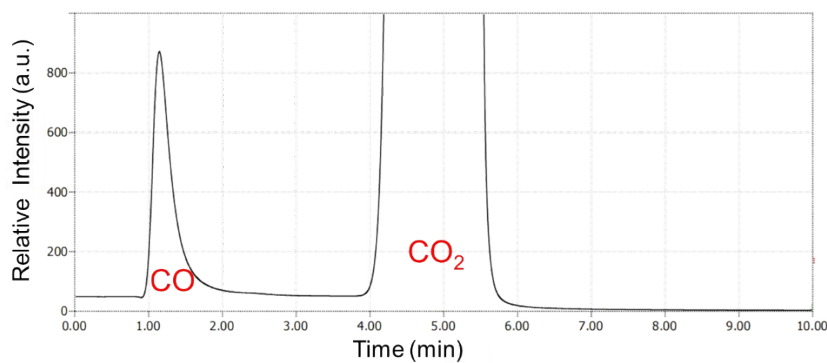

Fig. S19 GC profiles of 10% CO<sub>2</sub> reduction to CO with Ni- $\epsilon$ -Keggin as catalyst after reaction 6 h.

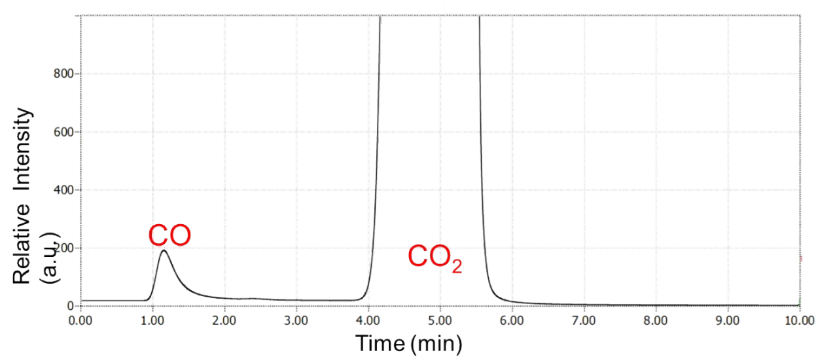

**Fig. S20** GC profiles of 10% CO<sub>2</sub> reduction to CO with **Co- $\epsilon$ -Keggin** as catalyst after reaction 6 h.

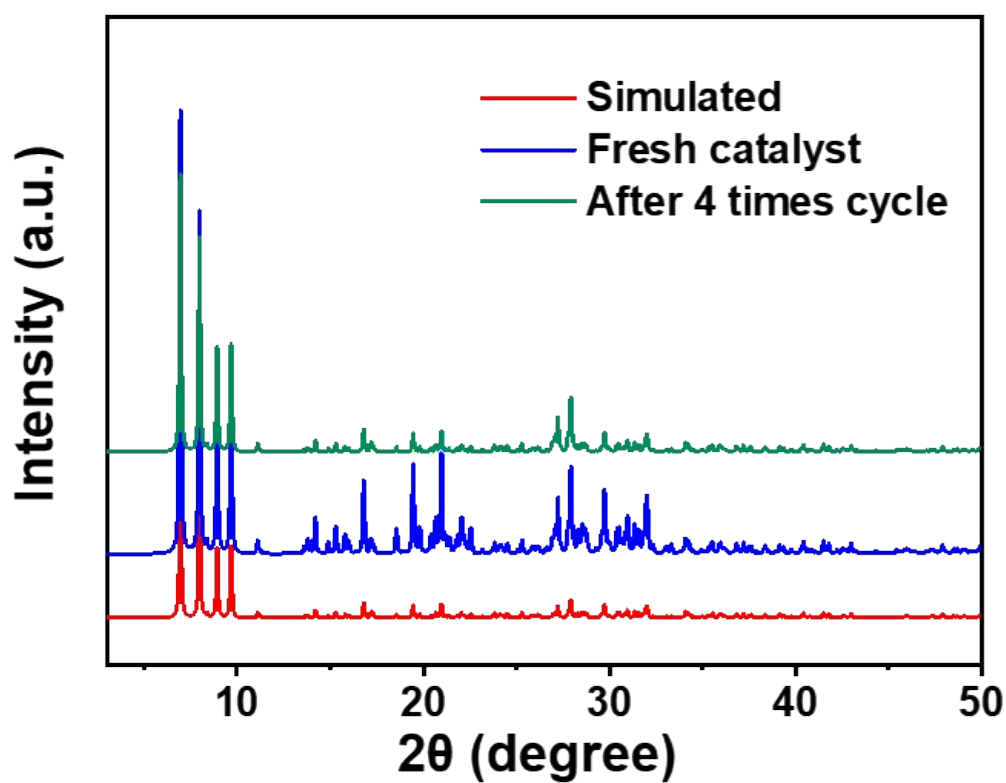

**Fig. S21** PXRD patterns of **Co- $\epsilon$ -Keggin** before and after CO<sub>2</sub>RR.



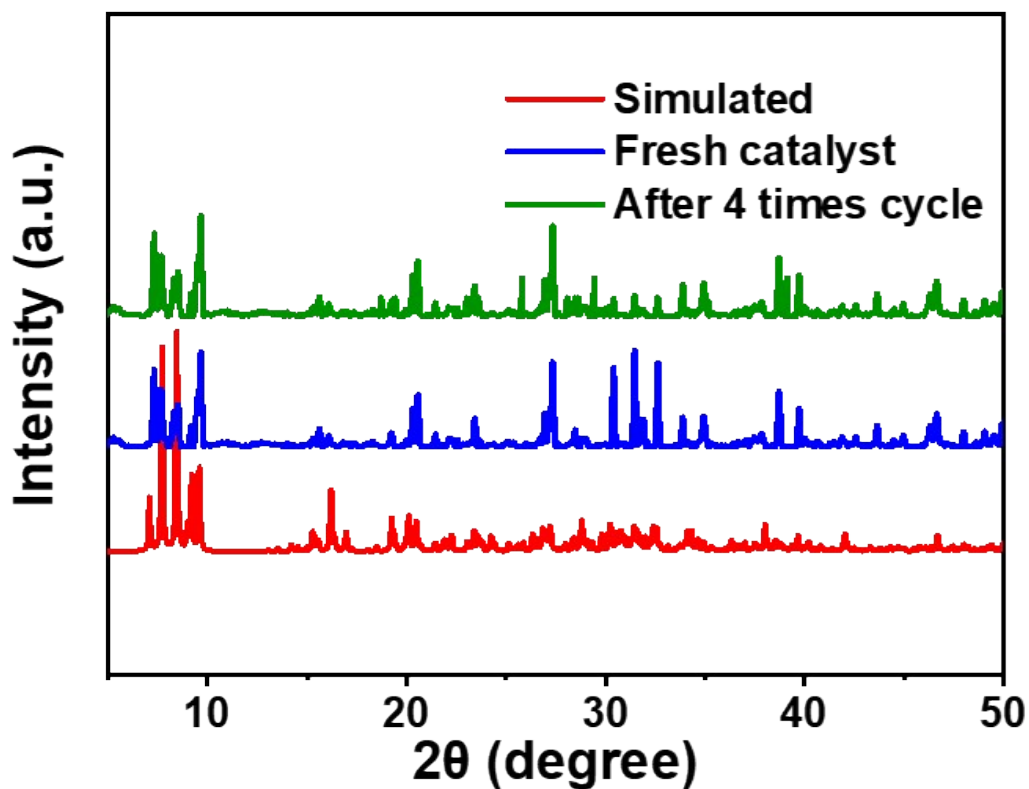

Fig. S22 PXRD patterns of Ni- $\epsilon$ -Keggin before and after CO<sub>2</sub>RR.

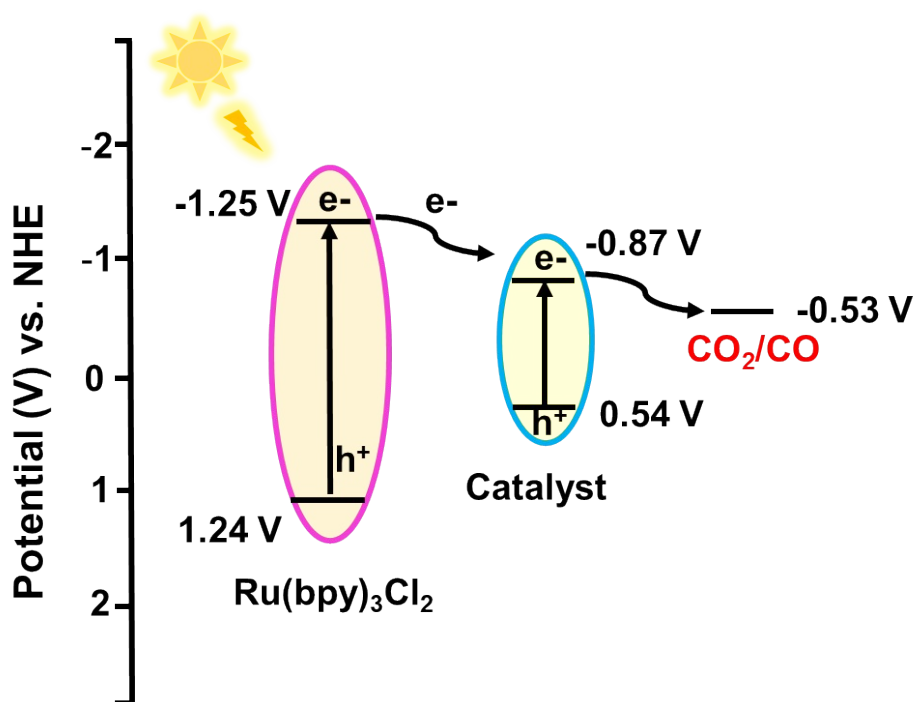

Fig. S23 Z- scheme diagram of the electron transfer process by using Ni- $\epsilon$ -Keggin as photocatalyst.

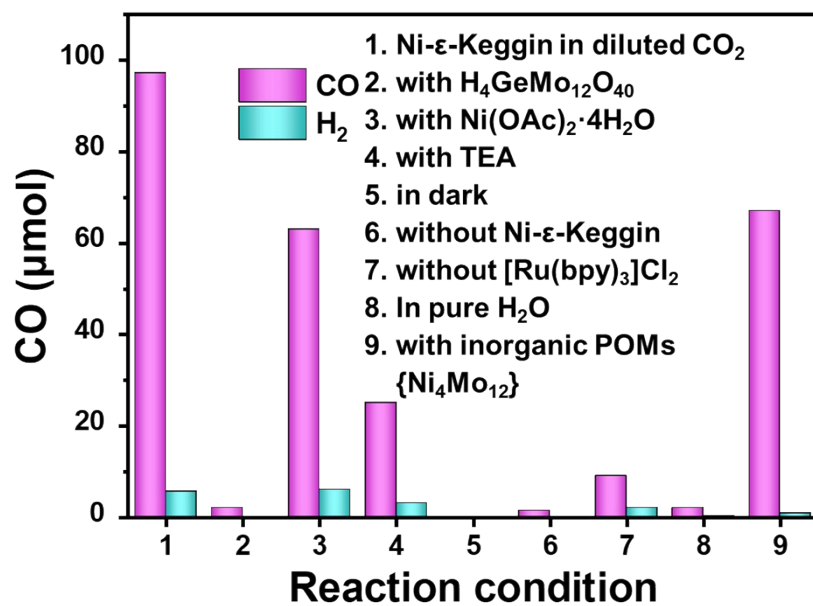

**Fig. S24** Comparison of the activity of the photocatalytic CO<sub>2</sub>RR under different conditions when catalyst **Ni-ε-Keggin** was used.

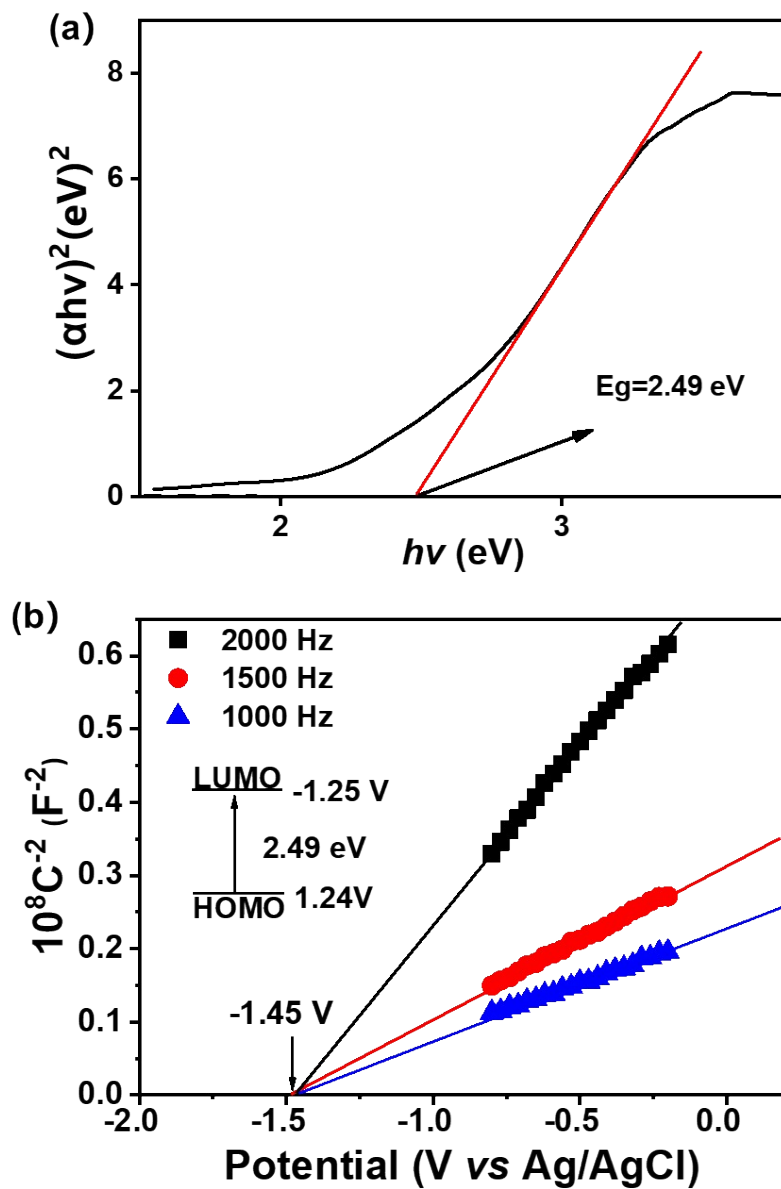

**Fig. S25** (a) K-M function curves of  $[\text{Ru}(\text{bpy})_3]\text{Cl}_2$ . (b) Mott-Schottky plots for  $[\text{Ru}(\text{bpy})_3]\text{Cl}_2$ .

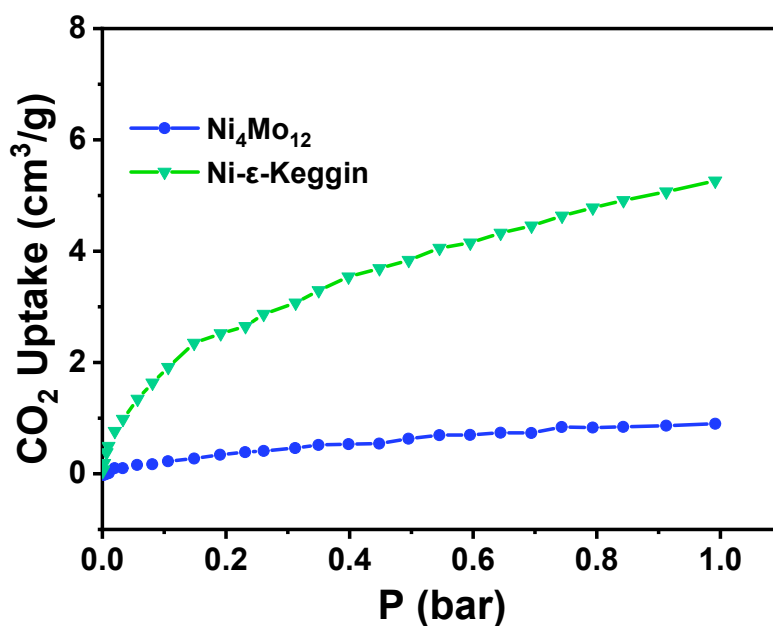

Fig. S26 CO<sub>2</sub> adsorption isotherms (298 K) of {Ni<sub>4</sub>Mo<sub>12</sub>} and Ni-ε-Keggin materials.

## 6. Table

Table S1. Comparison of reported POM-based hybrid materials photocatalyst for pure CO<sub>2</sub> to CO conversion.

| Photocatalyst                                                                                                                                                                                                                | Photosensitizer<br>Sacrificial agent                                         | Rate <sub>co</sub><br>(μmol g <sup>-1</sup> h <sup>-1</sup> ) | t  | Selectivity<br>CO (%) | Ref.         |
|------------------------------------------------------------------------------------------------------------------------------------------------------------------------------------------------------------------------------|------------------------------------------------------------------------------|---------------------------------------------------------------|----|-----------------------|--------------|
| Co-ε-Keggin                                                                                                                                                                                                                  | [Ru(bpy) <sub>3</sub> ]Cl <sub>2</sub> ·6H <sub>2</sub> O<br>triethanolamine | 7699.5                                                        | 6h | 96.5                  | This<br>work |
| Ni-ε-Keggin                                                                                                                                                                                                                  | [Ru(bpy) <sub>3</sub> ]Cl <sub>2</sub> ·6H <sub>2</sub> O<br>triethanolamine | 24657.2                                                       | 6h | 98.3                  | This<br>work |
| H <sub>26.5</sub> K <sub>2.5</sub> Na(H <sub>2</sub> O) <sub>16</sub> [Ni <sub>6</sub> (OH)<br>(BO <sub>3</sub> ) <sub>2</sub> (dien) <sub>2</sub> (B-α-SiW <sub>10</sub> O <sub>37</sub> ) <sub>2</sub> ·24H <sub>2</sub> O | [Ru(bpy) <sub>3</sub> ]Cl <sub>2</sub> ·6H <sub>2</sub> O<br>triethanolamine | 6988                                                          | 1h | 83.03                 | [1]          |
| [Co(en) <sub>2</sub> ] <sub>6</sub> [V <sub>12</sub> B <sub>18</sub> O <sub>54</sub><br>(OH) <sub>6</sub> ]·17H <sub>2</sub> O                                                                                               | [Ru(bpy) <sub>3</sub> ]Cl <sub>2</sub> ·6H <sub>2</sub> O<br>triethanolamine | 5700                                                          | 3h | 60                    | [2]          |
| (H <sub>2</sub> bbi) <sub>2</sub> {[Co <sub>2</sub> (bbi)]<br>[Co <sub>2.33</sub> (H <sub>2</sub> O) <sub>4</sub> ][H <sub>9.33</sub> CoP <sub>8</sub> Mo <sub>12</sub><br>O <sub>62</sub> ]}·4H <sub>2</sub> O              | [Ru(bpy) <sub>3</sub> ]Cl <sub>2</sub> ·6H <sub>2</sub> O<br>triethanolamine | 3261                                                          | 8h | -                     | [3]          |
| [Co <sub>2.67</sub> (SiW <sub>12</sub> O <sub>40</sub> )<br>(H <sub>2</sub> O) <sub>4</sub> (Htrz) <sub>4</sub> ]·C <sub>11.33</sub>                                                                                         | [Ru(bpy) <sub>3</sub> ]Cl <sub>2</sub> ·6H <sub>2</sub> O<br>triethanolamine | 5235                                                          | 6h | 52                    | [4]          |
| (C <sub>11</sub> NH <sub>10</sub> ) <sub>2</sub> {[Co(H <sub>2</sub> O) <sub>6</sub> ]}@                                                                                                                                     | [Ru(bpy) <sub>3</sub> ]Cl <sub>2</sub> ·6H <sub>2</sub> O                    | 6764.3                                                        | 8h | 96.89                 | [5]          |

|                                                                                                                                                            |                                                                                    |       |    |      |     |
|------------------------------------------------------------------------------------------------------------------------------------------------------------|------------------------------------------------------------------------------------|-------|----|------|-----|
| $[\text{H}_{29}\text{Co}_{16}\text{Mo}_{16}(\text{H}_2\text{O})_{16}(\text{PO}_4)_{24}\text{O}_{36}]\{(\text{H}_2\text{PO}_4)\cdot 25\text{H}_2\text{O}\}$ | triethanolamine                                                                    |       |    |      |     |
| $[\text{Co}_4(\text{PO}_4)(\text{C}_7\text{H}_8\text{N}_4)_6][\text{BW}_{12}\text{O}_{40}]\cdot 1.5\text{H}_2\text{O}$                                     | $[\text{Ru}(\text{bpy})_3]\text{Cl}_2\cdot 6\text{H}_2\text{O}$<br>triethanolamine | 10852 | 5h | 93.4 | [6] |

**Table S2.** Comparison of reported photocatalyst materials for 10% diluted CO<sub>2</sub> to CO conversion.

| Photocatalyst                                        | CO <sub>2</sub> (vol%) | Photosensitizer<br>Sacrificial agent                                    | Rate <sub>co</sub>                              | TOF (10 <sup>-3</sup> )s <sup>-1</sup> | SelectivityCO (%) | Ref.      |
|------------------------------------------------------|------------------------|-------------------------------------------------------------------------|-------------------------------------------------|----------------------------------------|-------------------|-----------|
| Co-ε-Keggin                                          | 10                     | $[\text{Ru}(\text{bpy})_3]\text{Cl}_2\cdot 6\text{H}_2\text{O}$<br>TEOA | 3496.0 (μmol g <sup>-1</sup> h <sup>-1</sup> )  | 2.5                                    | 18.4              | This work |
| Ni-ε-Keggin                                          | 10                     | $[\text{Ru}(\text{bpy})_3]\text{Cl}_2\cdot 6\text{H}_2\text{O}$<br>TEOA | 16199.3 (μmol g <sup>-1</sup> h <sup>-1</sup> ) | 11.7                                   | 94.6              | This work |
| COF-367-Co NS                                        | 10                     | $\text{Ru}(\text{bpy})_3^{2+}$<br>ascorbic acid                         | 2.587 mmol·g <sup>-1</sup> h <sup>-1</sup>      | /                                      | 72                | [7]       |
| Ni@TPHH-COF                                          | 10                     | $\text{Ru}(\text{bpy})_3^{2+}$<br>TEOA                                  | 3.28 mmol·g <sup>-1</sup> h <sup>-1</sup>       | /                                      | 95                | [8]       |
| Ni-MOF1                                              | 10                     | $\text{Ru}(\text{bpy})_3^{2+}$<br>TEOA                                  | 23.13 mmol g <sup>-1</sup>                      | /                                      | 84.3              | [9]       |
| Ni MOLs                                              | 10                     | $\text{Ru}(\text{bpy})_3^{2+}$<br>TEOA                                  | 12.5 (μmol/h)                                   | /                                      | 96.8              | [10]      |
| Co MOLs                                              | 10                     | $\text{Ru}(\text{bpy})_3^{2+}$<br>TEOA                                  | 0.44 (μmol/h)                                   | /                                      | 9.6               | [10]      |
| Ni-TpBpy                                             | 10                     | $[\text{Ru}(\text{bpy})_3]\text{Cl}_2/$<br>TEOA                         | 915 μmol g <sup>-1</sup>                        | /                                      | 76                | [11]      |
| COF-367-Co NSs                                       | 10                     | $[\text{Ru}(\text{bpy})_3]\text{Cl}_2/$<br>TEOA                         | 2875 (μmol g <sup>-1</sup> h <sup>-1</sup> )    | /                                      | 72                | [12]      |
| [Emim]BF <sub>4</sub> (56.41 wt%)-Zn-S-COF           | 15                     | /                                                                       | 105.88 (μmol g <sup>-1</sup> h <sup>-1</sup> )  | /                                      | /                 | [13]      |
| MAF-X27I-CI                                          | 10                     | $[\text{Ru}(\text{bpy})_3]\text{Cl}_2/$<br>TEOA                         | /                                               | 12                                     | 66.7              | [14]      |
| MAF-X27-OH                                           | 10                     | $[\text{Ru}(\text{bpy})_3]\text{Cl}_2/$<br>TEOA                         | /                                               | 28                                     | 97.2              | [14]      |
| MAF-X27I-OH                                          | 10                     | $[\text{Ru}(\text{bpy})_3]\text{Cl}_2/$<br>TEOA                         | /                                               | 59                                     | 98.2              | [14]      |
| MAF-X27-CI                                           | 10                     | $[\text{Ru}(\text{bpy})_3]\text{Cl}_2/$<br>TEOA                         | /                                               | 6.3                                    | 63.6              | [14]      |
| $[\text{Co}_2(\text{OH})\text{L}_1](\text{ClO}_4)_3$ | 10                     | $[\text{Ru}(\text{bpy})_3](\text{PF}_6)_2/$<br>TEOA                     | /                                               | 9.5                                    | 92.0              | [15]      |
| Ru(II)-Re(I) dinuclear complex                       | 10                     | BIH                                                                     | /                                               | 16.7                                   | 100               | [16]      |

**Table S3.** Selected bond lengths (Å) for **Co- $\epsilon$ -Keggin**.

|               |           |               |           |
|---------------|-----------|---------------|-----------|
| Ge(1)-O(1)#1  | 1.781(7)  | Ge(1)-O(1)    | 1.781(7)  |
| Ge(1)-O(7)#1  | 1.787(7)  | Ge(1)-O(7)    | 1.787(7)  |
| Mo(1)-O(20)   | 1.683(8)  | Mo(1)-O(4)    | 1.921(8)  |
| Mo(1)-O(4)#1  | 1.948(8)  | Mo(1)-O(11)   | 2.024(8)  |
| Mo(1)-O(16)#1 | 2.117(7)  | Mo(1)-O(7)#1  | 2.301(7)  |
| Mo(2)-O(9)    | 1.702(8)  | Mo(2)-O(13)   | 1.847(7)  |
| Mo(2)-O(11)   | 1.848(8)  | Mo(2)-O(2)    | 1.978(8)  |
| Mo(2)-O(12)   | 1.988(8)  | Mo(2)-O(7)#1  | 2.420(7)  |
| Mo(3)-O(19)   | 1.676(8)  | Mo(3)-O(6)    | 1.949(8)  |
| Mo(3)-O(5)    | 1.957(8)  | Mo(3)-O(15)   | 2.022(8)  |
| Mo(3)-O(8)    | 2.105(8)  | Mo(3)-O(1)#1  | 2.312(7)  |
| Mo(4)-O(10)   | 1.738(8)  | Mo(4)-O(15)   | 1.815(8)  |
| Mo(4)-O(18)   | 1.834(8)  | Mo(4)-O(2)    | 1.991(8)  |
| Mo(4)-O(12)   | 2.002(8)  | Mo(4)-O(1)#1  | 2.395(7)  |
| Mo(5)-O(17)   | 1.683(9)  | Mo(5)-O(3)#1  | 1.952(8)  |
| Mo(5)-O(3)    | 1.953(8)  | Mo(5)-O(18)#1 | 2.019(8)  |
| Mo(5)-O(8)#1  | 2.077(8)  | Mo(5)-O(1)    | 2.357(8)  |
| Mo(6)-O(14)   | 1.673(8)  | Mo(6)-O(5)    | 1.931(8)  |
| Mo(6)-O(6)    | 1.973(7)  | Mo(6)-O(13)#1 | 2.043(7)  |
| Mo(6)-O(16)   | 2.112(8)  | Mo(6)-O(7)    | 2.294(7)  |
| Co(1)-O(6)    | 2.065(8)  | Co(1)-O(2)    | 2.141(8)  |
| Co(1)-N(6)    | 2.144(10) | Co(1)-N(4)    | 2.145(10) |
| Co(1)-N(5)    | 2.155(10) | Co(1)-O(4)    | 2.165(8)  |

|              |           |              |           |
|--------------|-----------|--------------|-----------|
| Co(2)-O(3)#1 | 2.083(8)  | Co(2)-O(5)#1 | 2.104(8)  |
| Co(2)-N(1)   | 2.123(11) | Co(2)-N(2)   | 2.135(10) |
| Co(2)-O(12)  | 2.145(8)  | Co(2)-N(3)   | 2.168(11) |

**Table S4.** Selected bond lengths (Å) for **Ni- $\epsilon$ -Keggin**.

|               |          |              |          |
|---------------|----------|--------------|----------|
| Ge(1)-O(16)   | 1.772(5) | Mo(5)-O(8)   | 1.971(4) |
| Ge(1)-O(6)    | 1.772(5) | Mo(5)-O(6)   | 2.357(4) |
| Ge(1)-O(3)#1  | 1.777(4) | Mo(6)-O(24)  | 1.692(4) |
| Ge(1)-O(3)    | 1.777(4) | Mo(6)-O(12)  | 1.918(4) |
| Mo(1)-O(19)   | 1.689(6) | Mo(6)-O(15)  | 1.954(4) |
| Mo(1)-O(4)#1  | 1.949(4) | Mo(6)-O(13)  | 1.965(5) |
| Mo(1)-O(4)    | 1.949(4) | Mo(6)-O(5)   | 1.967(4) |
| Mo(1)-O(18)   | 2.074(4) | Mo(6)-O(3)   | 2.360(4) |
| Mo(1)-O(18)#1 | 2.074(4) | Ni(1)-O(2)   | 2.049(5) |
| Mo(1)-O(16)   | 2.316(6) | Ni(1)-N(4)   | 2.071(7) |
| Mo(2)-O(17)   | 1.696(6) | Ni(1)-N(3)   | 2.092(6) |
| Mo(2)-O(4)#1  | 1.951(4) | Ni(1)-N(3)#1 | 2.092(6) |
| Mo(2)-O(4)    | 1.951(4) | Ni(1)-O(5)#1 | 2.143(4) |
| Mo(2)-O(14)#1 | 2.056(4) | Ni(1)-O(5)   | 2.143(4) |
| Mo(2)-O(14)   | 2.056(4) | Ni(2)-O(1)   | 2.066(6) |
| Mo(2)-O(6)    | 2.309(5) | Ni(2)-N(1)   | 2.076(8) |
| Mo(3)-O(22)   | 1.692(4) | Ni(2)-N(2)   | 2.102(6) |
| Mo(3)-O(11)   | 1.936(3) | Ni(2)-N(2)#1 | 2.102(6) |
| Mo(3)-O(5)    | 1.938(4) | Ni(2)-O(9)   | 2.109(4) |
| Mo(3)-O(13)   | 1.949(5) | Ni(2)-O(9)#1 | 2.109(4) |

|             |          |             |          |
|-------------|----------|-------------|----------|
| Mo(3)-O(18) | 1.964(4) | Mo(4)-O(21) | 1.685(4) |
| Mo(3)-O(16) | 2.354(4) | Mo(4)-O(12) | 1.937(4) |
| Mo(4)-O(8)  | 1.946(4) | Mo(4)-O(7)  | 1.958(4) |
| Mo(4)-O(9)  | 1.951(4) | Mo(4)-O(3)  | 2.345(4) |
| Mo(5)-O(23) | 1.682(4) | Mo(5)-O(9)  | 1.957(4) |
| Mo(5)-O(10) | 1.940(3) | Mo(5)-O(14) | 1.968(4) |

**Table S5.** Bond valence calculation (BVC) for **Co- $\epsilon$ -Keggin**.

| Mo1  | Mo2  | Mo3  | Mo4  | Mo5  | Mo6  |
|------|------|------|------|------|------|
| 4.94 | 5.20 | 4.87 | 5.90 | 4.86 | 4.90 |

**Table S6.** Bond valence calculation (BVC) for **Ni- $\epsilon$ -Keggin**.

| Mo1  | Mo2  | Mo3  | Mo4  | Mo5  | Mo6  |
|------|------|------|------|------|------|
| 4.80 | 4.83 | 4.99 | 5.76 | 4.94 | 4.88 |

### X-ray crystallography

Select the crystal type and good quality crystal and glue it to the capillary glass tube. At 298 K, the crystallographic data of crystals **Co- $\epsilon$ -Keggin** and **Ni- $\epsilon$ -Keggin** were collected using Mo-K $\alpha$  rays ( $\lambda = 0.71073$  Å) using Bruker Apex II CCD diffractometer in  $\theta$  mode. The crystal structure of the compound was analyzed by the direct method using the SHELXL-2018/3 software package and refined by the least square method F<sup>2</sup>.

**Table S7.** Partial crystallographic data and structural refinement of **Co- $\epsilon$ -Keggin** and **Ni- $\epsilon$ -Keggin**.

| Compound       | <b>Co-<math>\epsilon</math>-Keggin</b>                                                             | <b>Ni-<math>\epsilon</math>-Keggin</b>                                                             |
|----------------|----------------------------------------------------------------------------------------------------|----------------------------------------------------------------------------------------------------|
| Formula        | C <sub>16</sub> H <sub>66</sub> Co <sub>4</sub> GeMo <sub>12</sub> N <sub>12</sub> O <sub>45</sub> | C <sub>16</sub> H <sub>64</sub> GeMo <sub>12</sub> N <sub>12</sub> Ni <sub>4</sub> O <sub>44</sub> |
| Formula weight | 2606.39                                                                                            | 2587.50                                                                                            |
| <i>T</i> (K)   | 293 (2)                                                                                            | 293 (2)                                                                                            |
| Crystal system | Monoclinic                                                                                         | Monoclinic                                                                                         |



|                                                                  |                                                               |                                                               |
|------------------------------------------------------------------|---------------------------------------------------------------|---------------------------------------------------------------|
| Space group                                                      | <i>C</i> 2/ <i>c</i>                                          | P 21/ <i>m</i>                                                |
| <i>a</i> (Å)                                                     | 16.107(7)                                                     | 12.829(3)                                                     |
| <i>b</i> (Å)                                                     | 21.036(7)                                                     | 18.764(5)                                                     |
| <i>c</i> (Å)                                                     | 18.501(7)                                                     | 13.571(3)                                                     |
| $\beta$ (°)                                                      | 98.575(6)°                                                    | 90°                                                           |
| <i>V</i> (Å <sup>3</sup> )                                       | 6199(4)                                                       | 3111.9(13)                                                    |
| <i>Z</i>                                                         | 4                                                             | 2                                                             |
| <i>D</i> <sub>c</sub> (mg m <sup>-3</sup> )                      | 2.793                                                         | 2.761                                                         |
| $\mu$ (mm <sup>-1</sup> )                                        | 3.958                                                         | 4.084                                                         |
| <i>F</i> (000)                                                   | 5000                                                          | 2488                                                          |
| $\theta$ range (°)                                               | 1.575-7.213                                                   | 1.575-27.213                                                  |
| Crystal size (mm <sup>3</sup> )                                  | 0.15×0.14×0.12                                                | 0.13×0.12×0.10                                                |
| Limiting indices                                                 | -19≤ <i>h</i> ≤17,<br>-24≤ <i>k</i> ≤25,<br>-22≤ <i>l</i> ≤22 | -15≤ <i>h</i> ≤15,<br>-22≤ <i>k</i> ≤22,<br>-16≤ <i>l</i> ≤16 |
| Reflections collected                                            | 20263                                                         | 22394                                                         |
| <i>R</i> (int)                                                   | 0.0822                                                        | 0.1024                                                        |
| Data / restraints / parameters                                   | 5463/65/411                                                   | 5694/65/437                                                   |
| GOF on <i>F</i> <sup>2</sup>                                     | 1.158                                                         | 1.052                                                         |
| <i>R</i> <sub>1</sub> <sup>a</sup> ,                             | <i>R</i> 1=0.0639,                                            | <i>R</i> 1=0.0458,                                            |
| <i>wR</i> <sub>2</sub> <sup>b</sup> [ <i>I</i> > 2σ( <i>I</i> )] | <i>wR</i> 2=0.1374                                            | <i>wR</i> 2=0.1229                                            |
| <i>R</i> <sub>1</sub> , <i>wR</i> <sub>2</sub>                   | <i>R</i> 1=0.0779,                                            | <i>R</i> 1=0.0538,                                            |
| (all data)                                                       | <i>wR</i> 2=0.1421                                            | <i>wR</i> 2=0.1287                                            |

## 7. Theoretical calculations

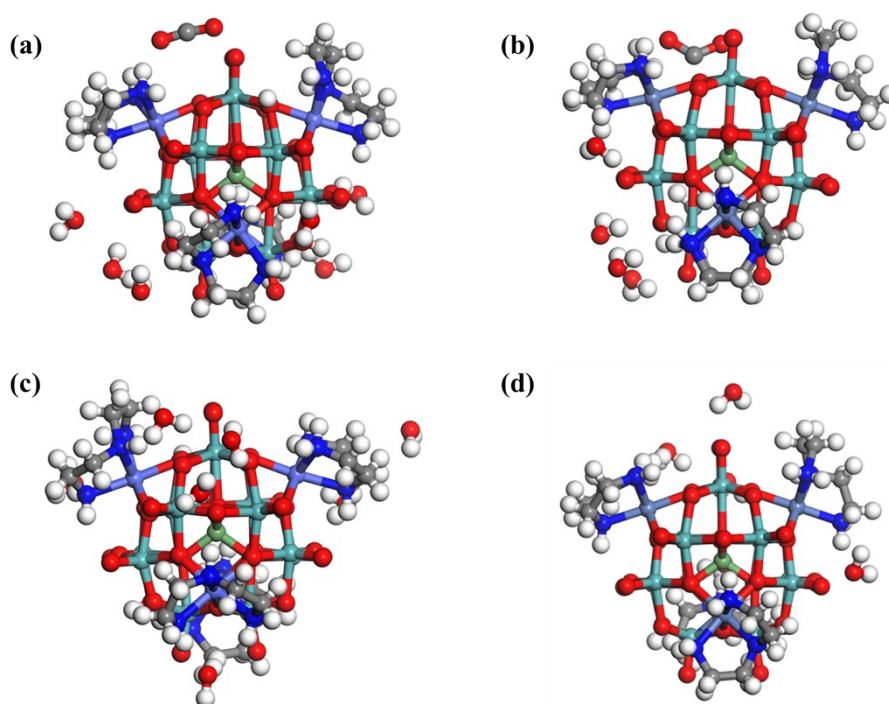

**Fig. S27** (a) DFT-derived CO<sub>2</sub> binding structures of catalyst **Co-ε-Keggin**. (b) DFT-derived CO<sub>2</sub> binding structures of catalyst **Ni-ε-Keggin**. (c) DFT-derived H<sub>2</sub>O binding structures of catalyst **Co-ε-Keggin**. (d) DFT-derived H<sub>2</sub>O binding structures of catalyst **Ni-ε-Keggin**.

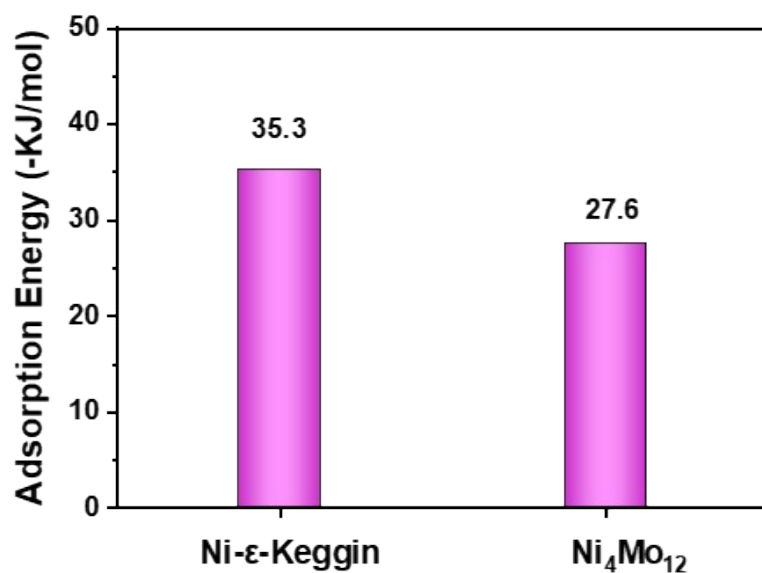

**Fig. S28** The adsorption energies of CO<sub>2</sub> for **Ni-ε-Keggin** and **Ni<sub>4</sub>Mo<sub>12</sub>** were compared.

## 8. References

- [1] Y. Chen, Z.-W. Guo, Y.-P. Chen, Z.-Y. Zhuang, G.-Q. Wang, X.-X. Li, S.-T. Zheng and G.-Y. Yang, *Inorg. Chem. Front.*, 2021, **8**, 1303–1311.
- [2] X. Yu, C.-C. Zhao, J.-X. Gu, C.-Y. Sun, H.-Y. Zheng, L.-K. Yan, M. Sun, X. L. Wang and Z.-M. Su, *Inorg. Chem.*, 2021, **60**, 7364–7371.
- [3] J.-N. Li, Z.-Y. Du, N.-F. Li, Y.-M. Han, T.-T. Zang, M.-X. Yang, X.-M. Liu, J.-L. Wang, H. Mei and Y. Xu, *Dalton Trans.*, 2021, **50**, 9137–9143.
- [4] W. Yao, C. Qin, N. Xu, J. Zhou, C. Sun, L. Liu and Z. Su, *CrystEngComm.*, 2019, **21**, 6423–6431.
- [5] C. Li, H.-Y. Jiang, J.-L. Wang, R.-K. Kang, H. Mei and Y. Xu, *Dalton Trans.*, 2022, **51**, 9616–9621.
- [6] Z.-Y. Du, Y.-N. Xue, X.-M. Liu, N.-F. Li, J.-L. Wang, H. Mei and Y. Xu, *J. Mater. Chem. A*, 2022, **10**, 3469–3477.
- [7] W. Liu, X. Li, C. Wang, H. Pan, W. Liu, K. Wang, Q. Zeng, R. Wang and J. Jiang, *J. Am. Chem. Soc.*, 2019, **141**, 17431–17440.
- [8] M. Dong, J. Zhou, J. Zhong, H. T. Li, C. Y. Sun, Y. D. Han, J. N. Kou, Z. H. Kang, X. L. Wang and Z. M. Su, *Adv. Funct. Mater.*, 2022, **32**, 2110136.
- [9] M. Dong, Y. Tian, J.-X. Gu, X.-H. Wang, L.-X. Wang, B.-S. Hou, A. Yousuf, C.-Y. Sun, J. Wu, Z.-H. Kang, X.-L. Wang and Z.-M. Su, *Inorg. Chem. Front.*, 2023, **10**, 1279–1285.
- [10] B. Han, X. Ou, Z. Deng, Y. Song, C. Tian, H. Deng, Y. J. Xu and Z. Lin, *Angew. Chem. Int. Ed.*, 2018, **57**, 16811–16815.
- [11] W. Zhong, R. Sa, L. Li, Y. He, L. Li, J. Bi, Z. Zhuang, Y. Yu and Z. Zou, *J. Am. Chem. Soc.*, 2019, **141**, 7615–7621.
- [12] W. Liu, X. Li, C. Wang, H. Pan, W. Liu, K. Wang, Q. Zeng, R. Wang and J. Jiang, *J. Am. Chem. Soc.*, 2019, **141**, 17431–17440.
- [13] Y. Yang, H.-Y. Zhang, Y. Wang, L.-H. Shao, L. Fang, H. Dong, M. Lu, L.-Z. Dong, Y.-Q. Lan and F.-M. Zhang, *Adv Mater.*, 2023, 2304170.
- [14] Y. Wang, N.-Y. Huang, J.-Q. Shen, P.-Q. Liao, X.-M. Chen and J.-P. Zhang, *J. Am. Chem. Soc.*, 2018, **140**, 38–41.
- [15] T. Ouyang, H. H. Huang, J. W. Wang, D. C. Zhong, T. B. Lu, *Angew. Chem. Int. Ed.*, 2017, **56**, 756–761.
- [16] T. Nakajima, Y. Tamaki, K. Ueno, E. Kato, T. Nishikawa, K. Ohkubo, Y. Yamazaki, T. Morimoto and O. Ishitani, *J. Am. Chem. Soc.*, 2016, **138**, 13818–13821.
- [17] A. Mueller, C. Beugholt, P. Koegerler, H. Bolgge, S. Bud'ko and M. Luban. *Inorg. Chem.*, 2000, **23**, 5176–5177.
